# Supplementary material
Source: PubMed Central journal article supplement (PMC7506214)

Supplementary figure 1

A.

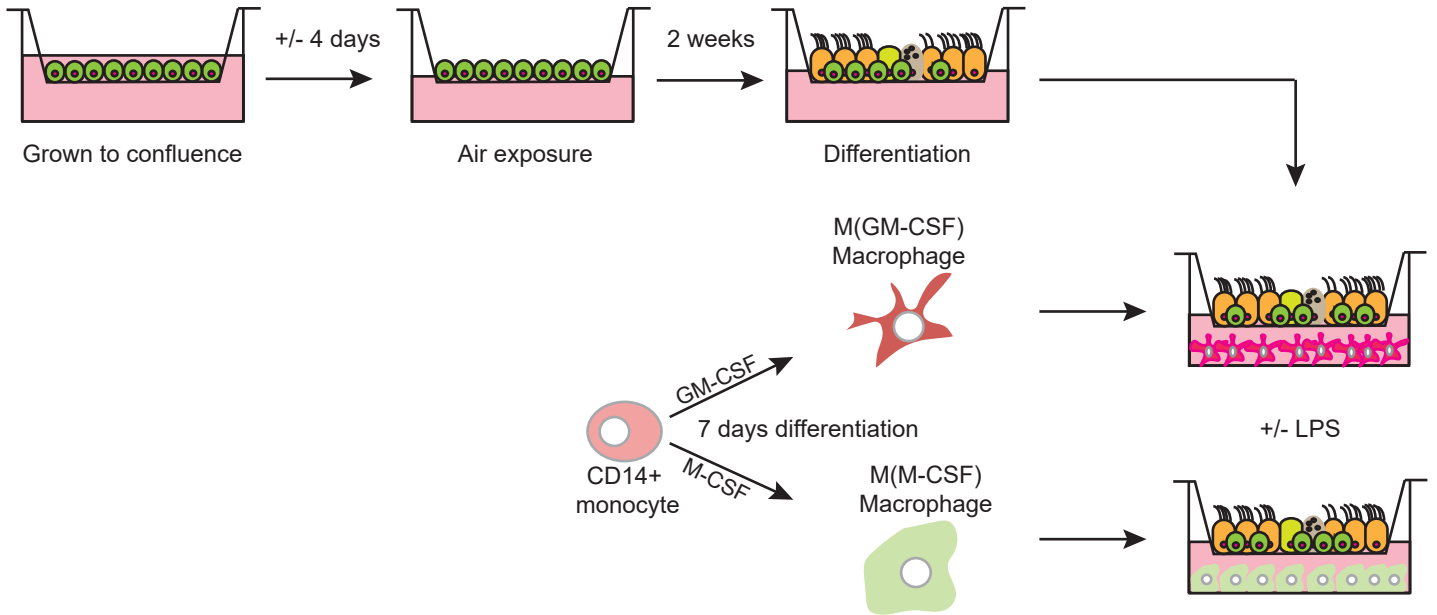

B.

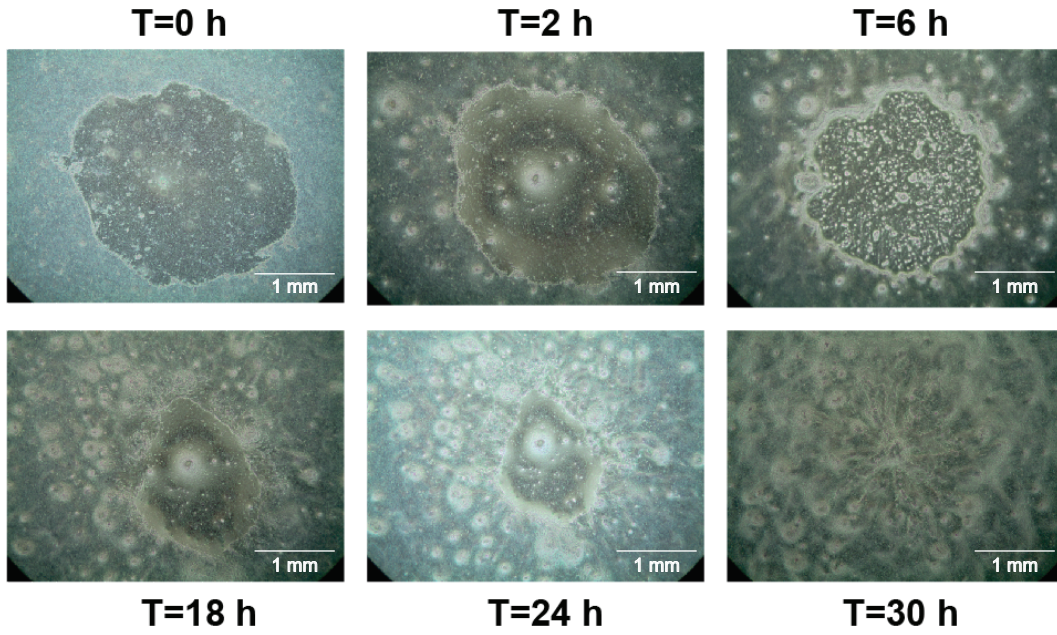

Supplement: jin-0012-0410-s02.pdf [file jin-0012-0410-s02.pdf]

Supplementary Figure 2

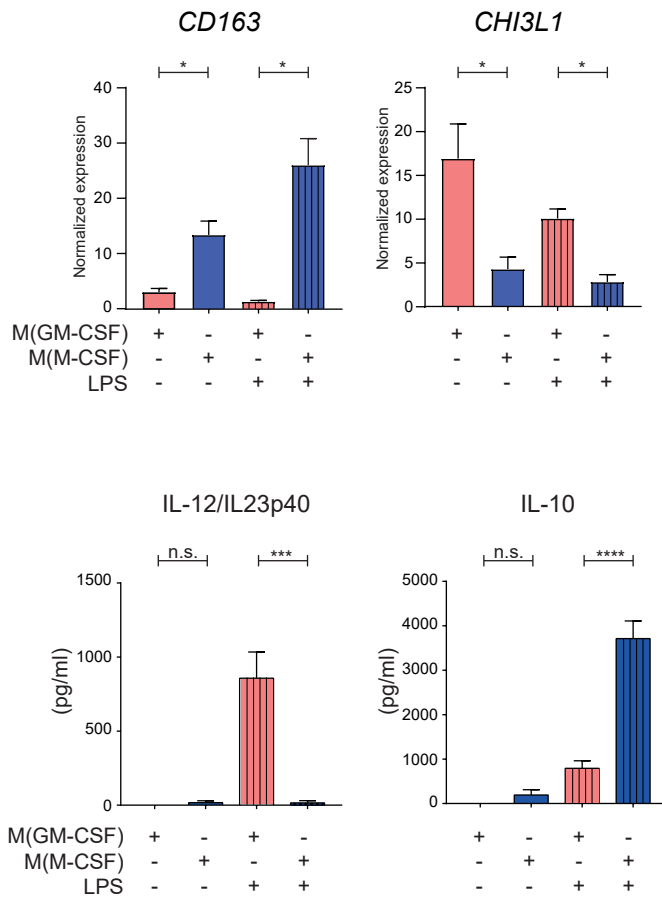

Supplement: jin-0012-0410-s03.pdf [file jin-0012-0410-s03.pdf]

Supplementary figure 3

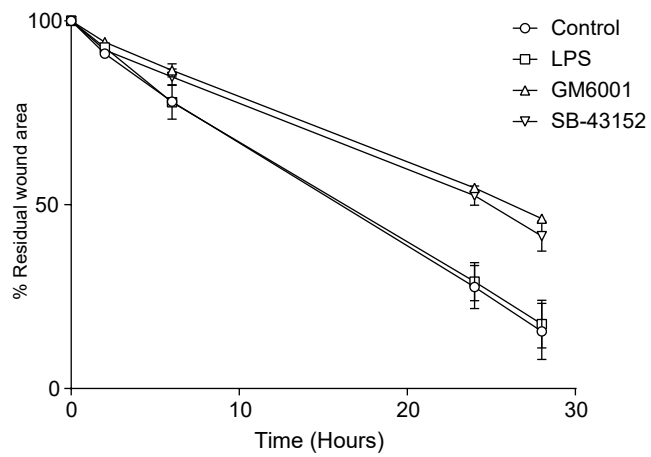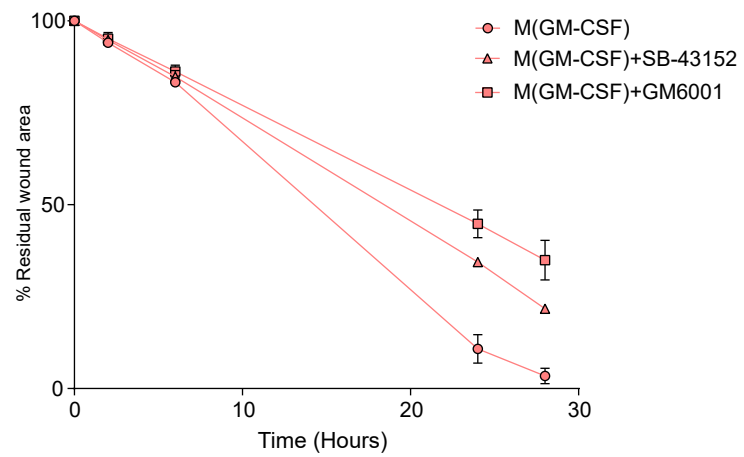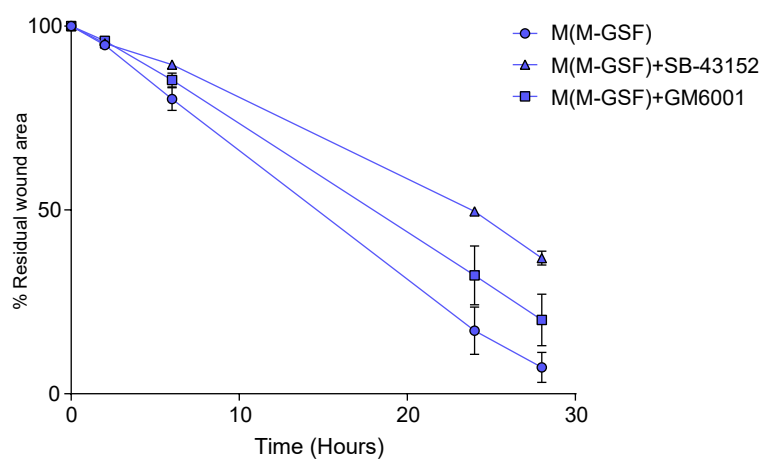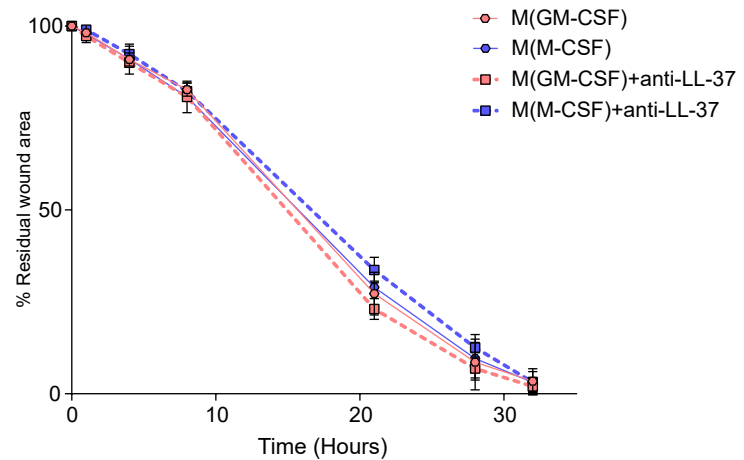

Supplement: jin-0012-0410-s04.pdf [file jin-0012-0410-s04.pdf]
